# Supplementary material for: Drug-Related Rhabdomyolysis: A Real-World FDA Adverse Event Reporting System Database Study
Source: Research Square preprint supplement (doi:10.21203/rs.3.rs-7536398/v1), 2025-10-30
Supplement: Supplementary file 1 [file e57c8e7f24f4e31deaf88f0e.docx]

**Table S1.** 2×2 table for signal detection.

| Type of drug | Target adverse reaction reports | Other adverse reaction reports | Sum |
| --- | --- | --- | --- |
| Target drug | a | b | a+b |
| Other drugs | c | d | c+d |
| Sum | a+c | b+d | N=a+b+c+d |

a, number of reports containing both the target drug and target adverse reaction reports; b, number of reports containing other adverse reaction reports of the target drug; c, number of reports containing the target adverse reaction reports of other drugs; d, number of reports containing other drugs and other adverse reaction reports; N, the number of reports.

**Table S2.** Four major algorithms used for signal detection.

| Algorithms | Equation | Criteria |
| --- | --- | --- |
| ROR | ROR= (a/c)/(b/d) | 95% CI>1, N≥3 |
| 95%CI=eln(ROR)±1.96(1/a+1/b+1/c+1/d)^0.5 |
| PRR | PRR=[a/(a+b)]/[c/(c+d)] | PRR≥2, χ2≥4, N≥3 |
| χ2=[(ad-bc)^2](a+b+c+d)/[(a+b)(c+d)(a+c)(b+d)] |
| MGPS | EBGM=a(a+b+c+d)/[(a+c)(a+b)] | EBGM05>2 |
| EBGM05=eln(EBGM)-1.64(1/a+1/b+1/c+1/d)^0.5 |
| BCPNN | IC=log2a(a+b+c+d)/[(a+c)(a+b)] | IC025>0 |
| IC025 = eln(IC) − 1.96(1/a + 1/b + 1/c + 1/d)^0.5 |

a, number of reports containing both the target drug and target adverse reaction reports; b, number of reports containing other adverse reaction reports of the target drug; c, number of reports containing the target adverse reaction reports of other drugs; d, number of reports containing other drugs and other adverse reaction reports. 95%CI, 95% confidence interval; N, the number of reports; χ2, chi-squared; EBGM, empirical Bayesian geometric mean; EBGM05, the lower limit of 95% CI of EBGM; IC, information component; IC025, the lower limit of 95% CI of the IC. ROR, reporting odds ratio; PRR, proportional reporting ratio; MGPS, multi-item gamma poisson shrinker; BCPNN, Bayesian confidence propagation neural network.
